# Supplementary material for: Microvesicle release from inner segments of healthy photoreceptors is a conserved phenomenon in mammalian species
Source: PubMed Central journal article supplement (PMC9796728; doi:10.1242/dmm.049871), 2022-11-23
Supplement: dmm-15-049871-s1.pdf [file dmm-15-049871-s1.pdf]

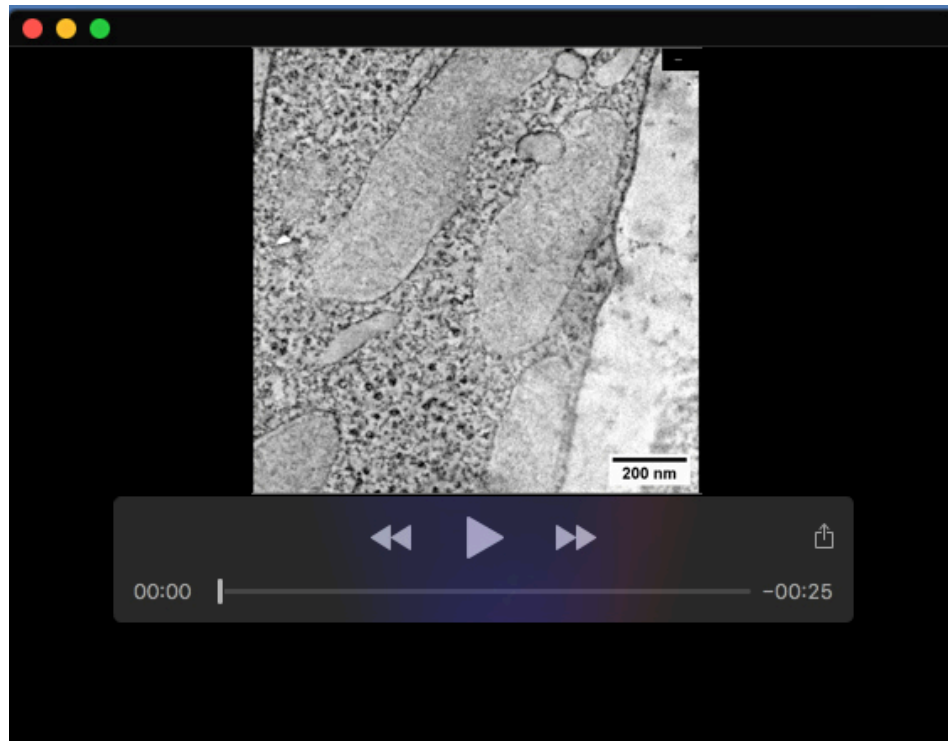

**Movie 1. Microvesicle released from the inner segment plasma membrane with a staining pattern matching the cytoplasm. Tomogram associated with Fig. 2A.**

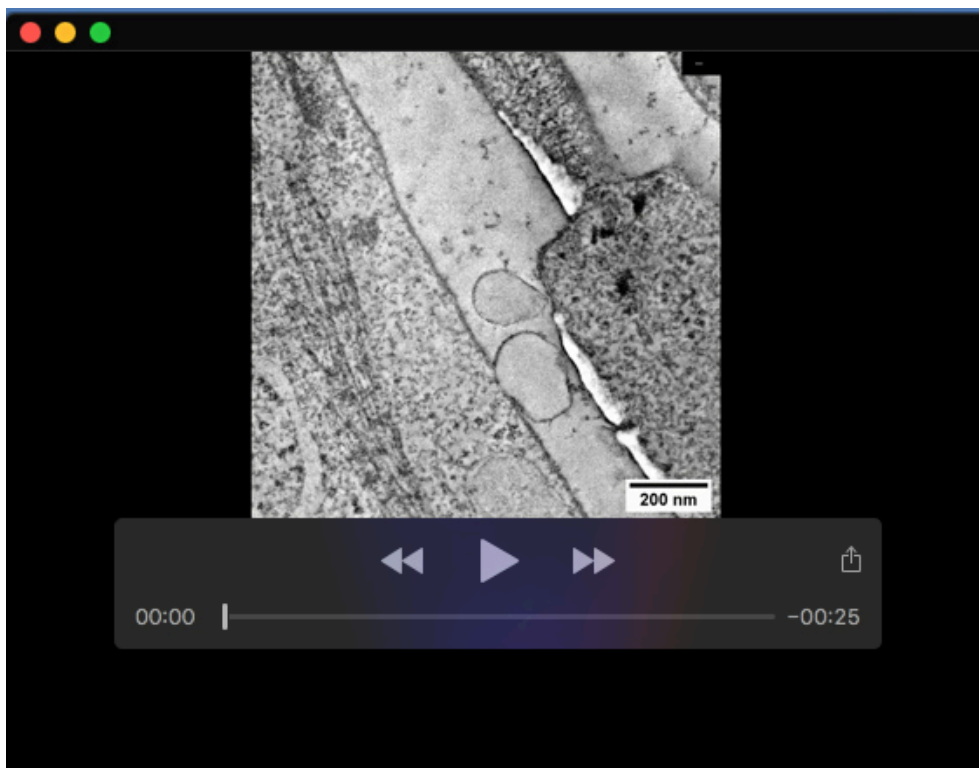

**Movie 2. Microvesicle released from the inner segment plasma membrane with a clear staining pattern. Tomogram associated with Fig. 2B.**

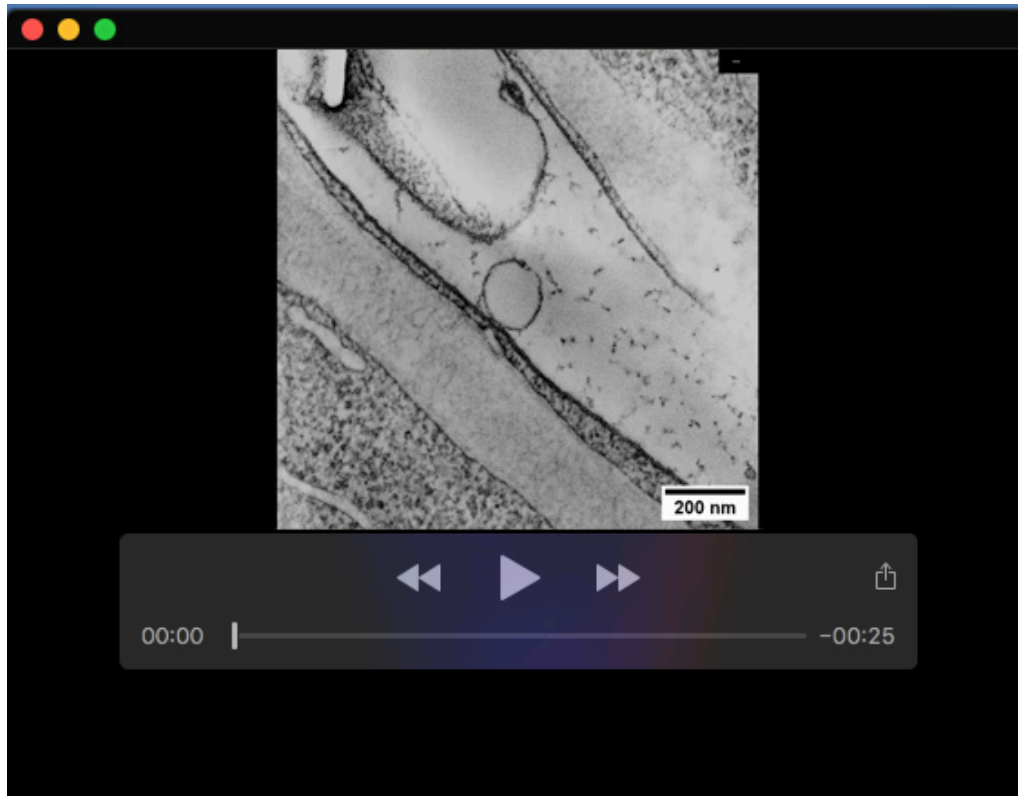

**Movie 3. Extracellular vesicular structure connected to inner segment mitochondrion through a short membrane tunnel.** Tomogram associated with Fig. 3A.

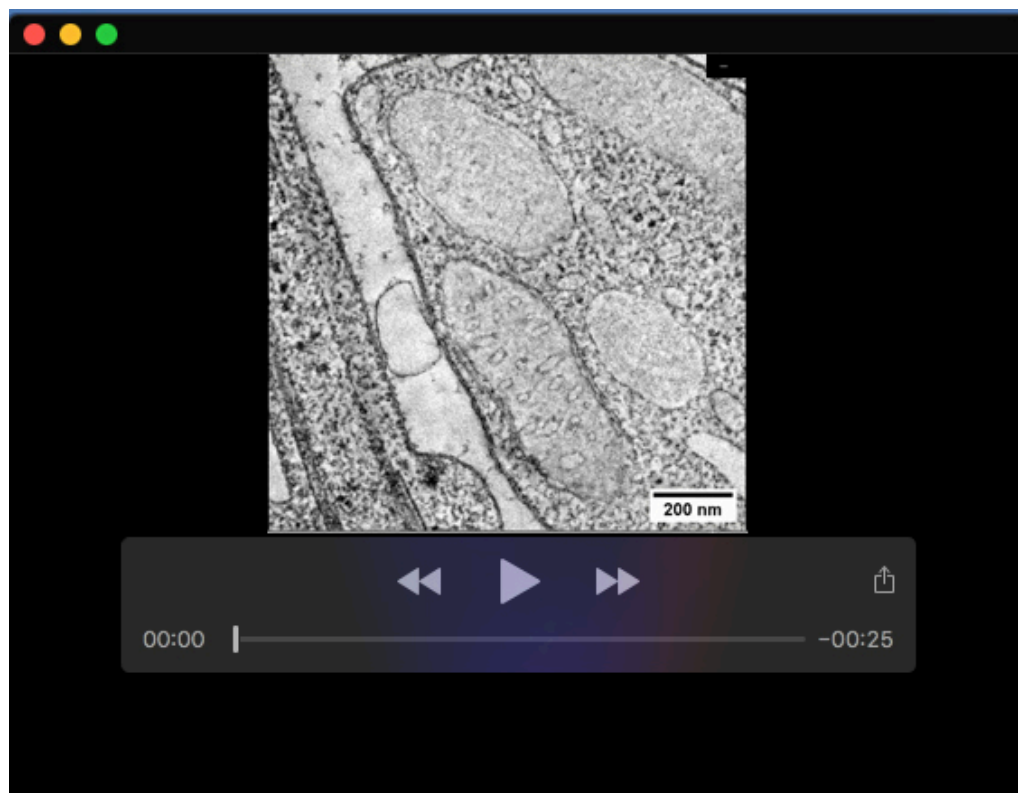

**Movie 4. Extracellular vesicular structure connected to inner segment mitochondrion through a complex membrane tunnel.** Tomogram associated with Fig. 4A.

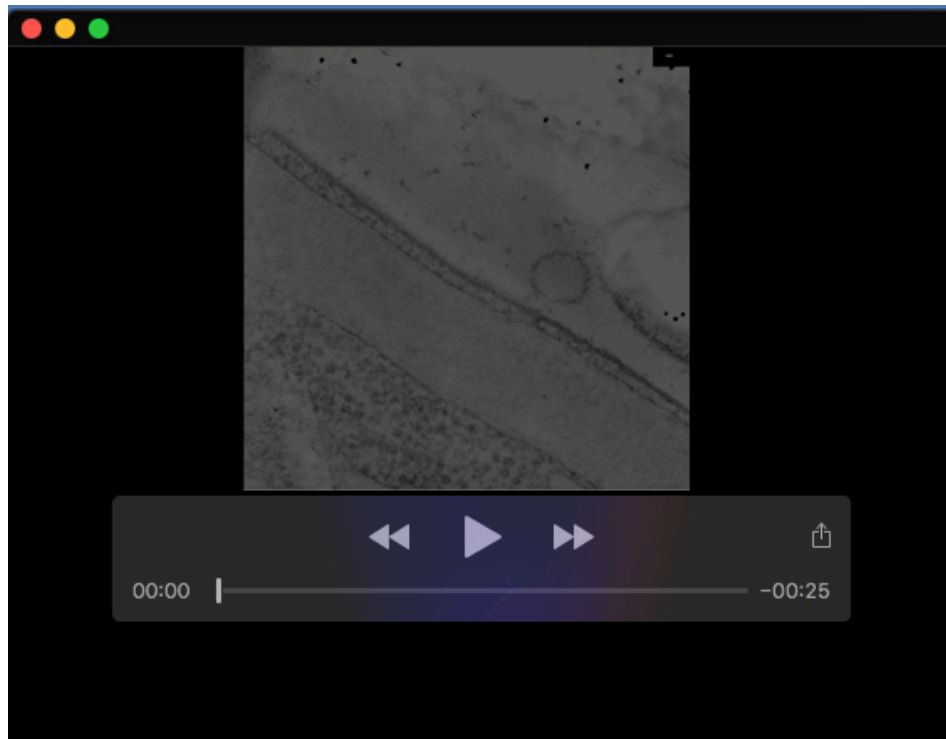

**Movie 5. Segmentation of an extracellular vesicular structure connected to inner segment mitochondrion through a short membrane tunnel.** Tomogram segmentation associated with Fig. 3B.

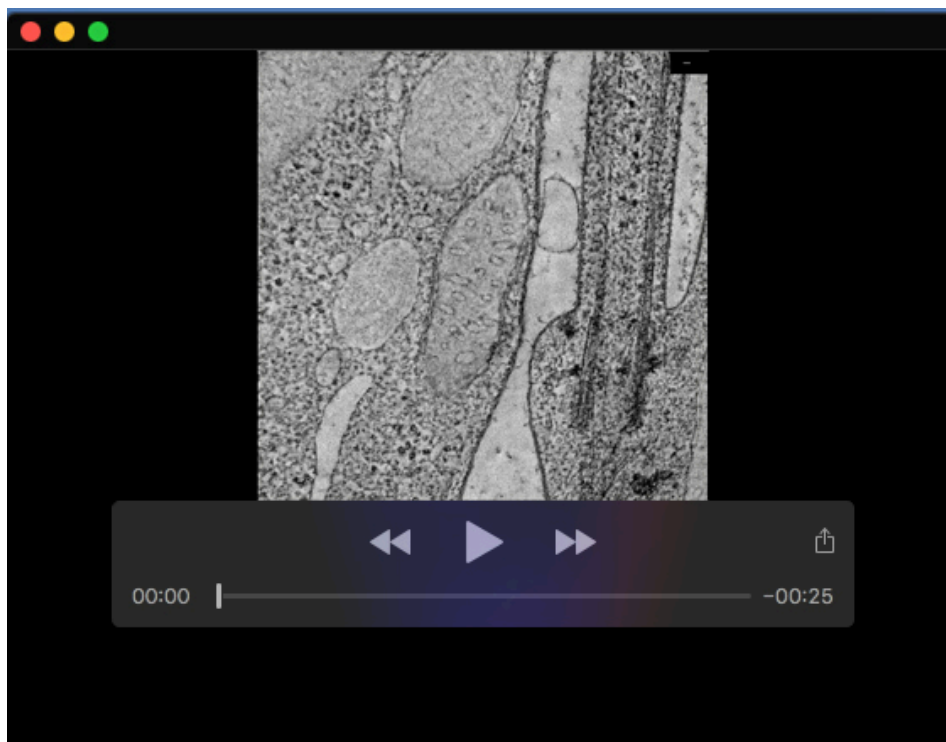

**Movie 6. Segmentation of an extracellular vesicular structure connected to inner segment mitochondrion through a complex membrane tunnel.** Tomogram segmentation associated with Fig. 4B.
